# Supplementary material for: Discovery of Q203, a potent clinical candidate for the treatment of tuberculosis
Source: Springer Nature journal article supplement (doi:10.1038/nm.3262), 2013-08-04
Supplement: 41591_2013_BFnm3262_MOESM5_ESM.pdf [file 41591_2013_BFnm3262_MOESM5_ESM.pdf]

## SUPPLEMENTARY INFORMATION

### Discovery of Q203, a potent clinical candidate for the treatment of tuberculosis.

Kevin Pethe, Pablo Bifani, Jichan Jang, Sunhee Kang, Seijin Park, Sujin Ahn, Jan Jiricek, Juyoung Jung, Hee Kyoung Jeon, Jonathan Cechetto, Thierry Christophe, Honggun Lee, Marie Kempf, Mary Jackson, Anne J. Lenaerts, Ha Pham, Victoria Jones, Min Jung Seo, Young Mi Kim, Mooyoung Seo, Jeong Jea Seo, Dongsik Park, Yoonae Ko, Inhee Choi, Ryangyeo Kim, Se Yeon Kim, SeungBin Lim, SeungAe Yim, Jiyoung Nam, Hwankyung Kang, Haejin Kwon, Chun-Taek Oh, Yoojin Cho, Yunhee Jang, Junghwan Kim, Adeline Chua, Bee Huat Tan, Mahesh B. Nanjundappa, Srinivasa P.S. Rao, Whitney S. Barnes, René Wintjens, John R. Walker, Sylvie Alonso, Saeyeon Lee, Jungjun Kim, Soohyun Oh, Taegwon Oh, Ulf Nehrbass, Sung-Jun Han, Zaesung No, Jinhwa Lee, Priscille Brodin, Sang-Nae Cho, Kiyeon Nam and Jaeseung Kim

### Supplementary Figures 1-8

### Supplementary Tables 1-7

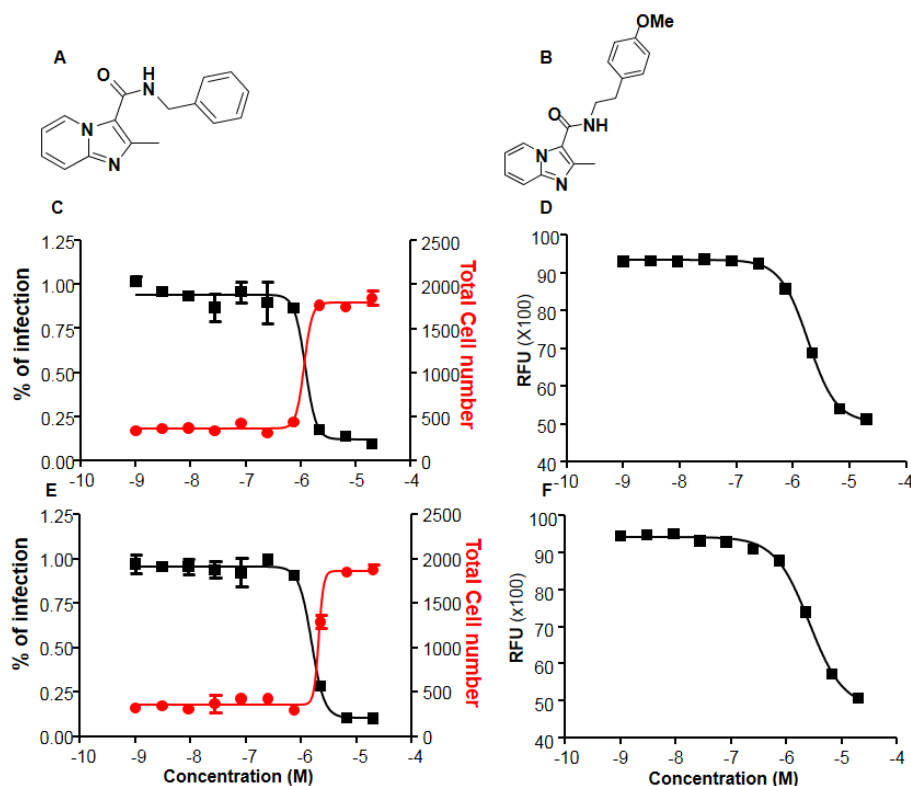

**Supplementary Figure 1. Activity of IPA01 and IPA02 against *M. tuberculosis* H37Rv.** (A) Structure of IPA01 and (B) structure of IPA02. The inhibitory activity of IPA01 (C and D) and IPA02 (E and F) were tested in dose-response against *M. tuberculosis* replicating inside macrophages (C and E) and in culture broth medium (D and F). Each concentration was tested in duplicate, the assays were repeated at least two times. The MIC<sub>50</sub> of IPA01 and IPA02 replicating inside macrophages was 1.25  $\mu$ M and 1.57  $\mu$ M, respectively. The MIC<sub>50</sub> of IPA01 and IPA02 replicating in culture broth medium was 1.86  $\mu$ M and 2.63  $\mu$ M, respectively.

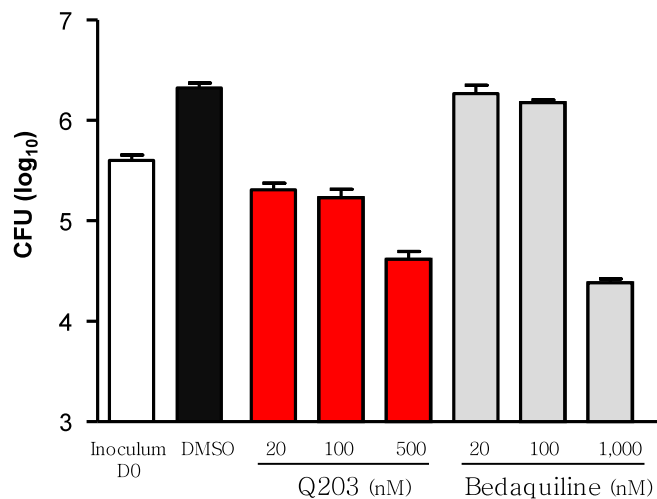

**Supplementary Figure 2. Activity of Q203 against *M. tuberculosis* by CFU determination.** *M. tuberculosis* was exposed to DMSO (untreated control), Q203 or bedaquiline for 5 days in liquid broth medium (7H9-ADS-tween 80 0.05%). Cultures were serial-diluted and plated on 7H11-agar plates. Colony Forming Unit were determined after 3 weeks of incubation at 37°C. Initial inoculum size at day 0 (inoculum D0) is shown. Each concentration was tested in triplicate.

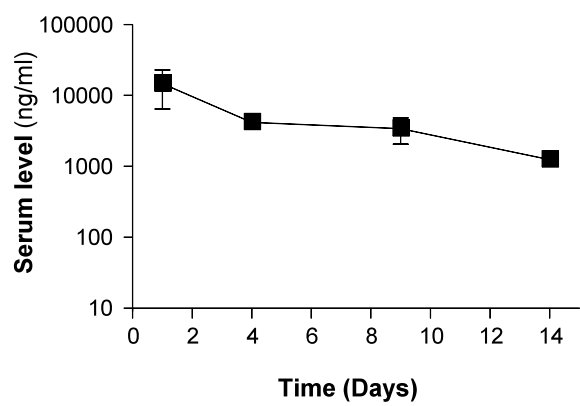

**Supplementary Figure 3. Serum level after a single administration of 1,000 mg kg<sup>-1</sup> in the mouse model.**

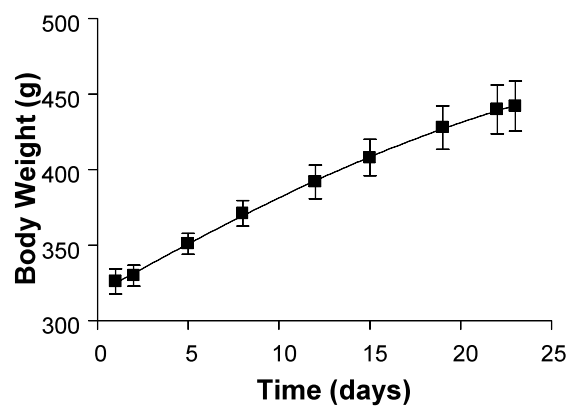

**Supplementary Figure 4. Progression of the body weight of rats during a long-term administration study.**

10 mg/kg of Q203 was administered to male SD rats for 20 days. Weight variation was monitored throughout the study and up to 3 days after the last administration. Each point represents the mean and standard variation of the body weight of five animals.

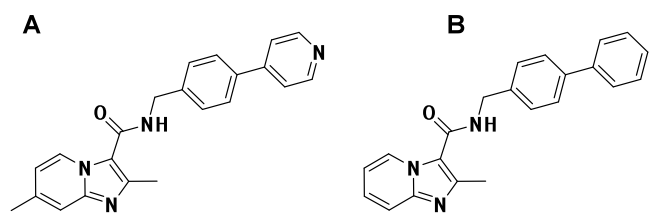

**Supplementary Figure 5. Structure of IPA04 and IPA05**

The MIC<sub>50</sub> of IPA04 (A) and IPA05 (B) against *M. tuberculosis* replicating in culture broth medium was of 10 nM and 5 nM, respectively.

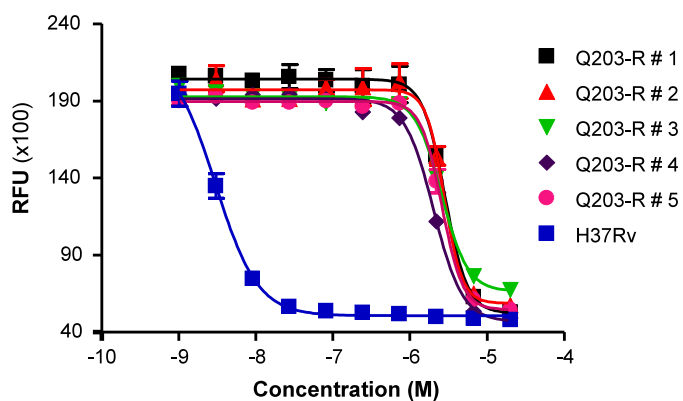

**Supplementary Figure 6. Activity of Q203 against 5 spontaneous-resistant clones selected on Q203.** Dose-response of Q203 against Q203-R clones #1-5 using the resazurin-based assay. The activity of Q203 against the 5 spontaneous-resistant clones was between 3.0 and 3.7  $\mu\text{M}$ . In this representative experiment, the  $\text{MIC}_{50}$  of Q203 against H37rv was 2.9 nM. Each concentration was tested in triplicates, the experiment was performed two times.

|           |     |               |        |     |
|-----------|-----|---------------|--------|-----|
| H37Rv     | 301 | SAGSQPDFYMMWT | EGLARI | 319 |
| CDC1551   | 301 | SAGSQPDFYMMWT | EGLARI | 319 |
| W4        | 301 | SAGSQPDFYMMWT | EGLARI | 319 |
| XDR #27   | 301 | SAGSQPDFYMMWT | EGLARI | 319 |
| XDR #29   | 301 | SAGSQPDFYMMWT | EGLARI | 319 |
| XDR #31   | 301 | SAGSQPDFYMMWT | EGLARI | 319 |
|           |     |               |        |     |
| Q203-R #1 | 301 | SAGSQPDFYMMWA | EGLARI | 319 |
| Q203-R #2 | 301 | SAGSQPDFYMMWA | EGLARI | 319 |
| Q203-R #3 | 301 | SAGSQPDFYMMWA | EGLARI | 319 |
| Q203-R #4 | 301 | SAGSQPDFYMMWA | EGLARI | 319 |
| Q203-R #5 | 301 | SAGSQPDFYMMWA | EGLARI | 319 |

**Supplementary Figure 7. Polymorphism in *qcrB* identified by sequencing.** *QcrB* was amplified from various strains of *M. tuberculosis* and sequenced. The polymorphism T313A was identified in 5/5 strains resistant to Q203 (Q203-R #1-5). No polymorphism was identified in the pan-susceptible clinical isolates CDC1551, W4 or in the XDR strains #27, #29 and #31.





**Supplementary Table 1. Activity of IPA01 against 9 clinical isolates of *M. tuberculosis*.** The inhibitory activity of IPA01 was tested in dose-response against *M. tuberculosis* replicating in culture broth medium. Each concentration was tested in duplicate, the assays were repeated at least once.

| #   | INH | Rif | Strept | EMB | MIC <sub>90</sub><br>( $\mu$ M) |
|-----|-----|-----|--------|-----|---------------------------------|
| 33  | R   | R   | S      | S   | 2.0                             |
| 48  | R   | R   | R      | R   | 3.1                             |
| 61  | R   | R   | R      | R   | 1.9                             |
| 80  | R   | R   | R      | R   | 1.6                             |
| 125 | R   | R   | R      | S   | 1.3                             |
| 137 | R   | R   | R      | R   | 6.9                             |
| 143 | R   | R   | R      | R   | 1.3                             |
| 146 | R   | R   | R      | R   | 9.2                             |
| 171 | S   | S   | S      | S   | 1.2                             |

INH : isoniazid, Rif : rifampin, Strept : streptomycin,  
EMB : ethambutol

**Supplementary Table 2. Activity of IPA derivatives against *M. tuberculosis* H37Rv.** The inhibitory activity of the IPA derivatives was tested in dose-response against *M. tuberculosis* replicating in culture broth medium. Each concentration was tested in duplicate, the assay was repeated at least two times.

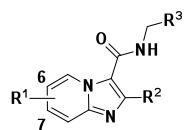

| #     | R <sup>1</sup> | R <sup>2</sup> | R <sup>3</sup> | MIC <sub>50</sub> (μM) |
|-------|----------------|----------------|----------------|------------------------|
| IPA01 | H              | Me             |                | 2.03                   |
| IPA02 | H              | Me             |                | 2.63                   |
| IPA03 | H              | Et             |                | 0.013                  |
| Q-203 | 6-Cl           | Et             |                | 0.0027                 |

**Supplementary Table 3. Activity of Q203 against a bacterial and micro-organisms panel.**

| Bacteria                                         | MIC <sub>90</sub><br>( $\mu$ M) |
|--------------------------------------------------|---------------------------------|
| <i>Mycobacterium bovis</i> BCG                   | 0.0035                          |
| <i>Mycobacterium smegmatis</i>                   | >20                             |
| <i>Mycobacterium marinum</i>                     | 3.5                             |
| <i>Mycobacterium avium</i>                       | >28                             |
| <i>Mycobacterium terrae</i>                      | 7.1                             |
| <i>Mycobacterium intracellulare</i>              | >28                             |
| <i>Mycobacterium nonchromogenicum</i>            | 14                              |
| <i>Mycobacterium xenopi</i>                      | >28                             |
| <i>Acinetobacter baumannii</i> CIP107292         | >100                            |
| <i>Acinetobacter baumannii</i> CIP5377           | >100                            |
| <i>Acinetobacter baumannii</i> SAN008            | >100                            |
| MR <i>Staphylococcus aureus</i> 0706C0025        | >100                            |
| MR <i>Staphylococcus aureus</i> clinical isolate | >100                            |
| <i>Escherichia coli</i> ATCC25922                | >100                            |
| <i>Enterobacter aerogenes</i> 0705A0867          | >100                            |
| <i>Enterobacter cloacae</i> clinical strain      | >100                            |
| <i>Klebsiella oxytoca</i> clinical strain        | >100                            |
| <i>Salmonella enteridis</i> clinical strain      | >100                            |
| <i>Enterococcus faecium</i> clinical strain      | >100                            |
| <i>Enterococcus faecalis</i> clinical strain     | >100                            |
| <i>Pseudomonas aeruginosa</i> ATCC27853          | >100                            |
| <i>Pseudomonas aeruginosa</i> clinical strain    | >100                            |
| <i>Pseudomonas aeruginosa</i> clinical strain    | >100                            |
| <i>Corynebacterium striatum</i> clinical strain  | >100                            |
| <i>Candida albicans</i> ATCC66396                | >100                            |
| <i>Bacillus subtilis</i> CIP 5262                | >100                            |
| <i>Saccharomyces cerevisiae</i> clinical strain  | >100                            |

**Supplementary Table 4.** Activity of Q203 against MDR and XDR *M. tuberculosis* clinical isolates. The strains were classified as belonging to the Beijing family (Beijing) or non-Beijing family (-).

| Type | #   | Family  | INH     | Rif | Strept | Oflox | MIC <sub>90</sub><br>(nM) |       |
|------|-----|---------|---------|-----|--------|-------|---------------------------|-------|
| MDR  | 4   | Beijing | R       | R   | R      | S     | 0.43                      |       |
|      | 5   | Beijing | R       | R   | S      | R     | <0.43                     |       |
|      | 6   | Beijing | R       | R   | S      | R     | <0.43                     |       |
|      | 7   | Beijing | R       | R   | S      | R     | <0.43                     |       |
|      | 8   | -       | R       | R   | S      | R     | <0.43                     |       |
|      | 9   | Beijing | R       | R   | R      | S     | <0.43                     |       |
|      | 10  | Beijing | R       | R   | S      | S     | <0.43                     |       |
|      | 11  | Beijing | R       | R   | S      | R     | <0.43                     |       |
|      | 12  | Beijing | R       | R   | S      | R     | 0.98                      |       |
|      | 13  | Beijing | R       | R   | S      | S     | <0.43                     |       |
|      | 14  | Beijing | R       | R   | S      | S     | 0.88                      |       |
|      | 15  | Beijing | R       | R   | S      | R     | 3.51                      |       |
|      | 16  | Beijing | R       | R   | R      | S     | <0.43                     |       |
|      | XDR | 17      | Beijing | R   | R      | R     | R                         | 0.43  |
|      |     | 18      | Beijing | R   | R      | R     | R                         | <0.43 |
|      |     | 19      | -       | R   | R      | R     | R                         | <0.43 |
| 20   |     | -       | R       | R   | R      | R     | <0.43                     |       |
| 21   |     | Beijing | R       | R   | R      | R     | <0.43                     |       |
| 22   |     | -       | R       | R   | R      | R     | <0.43                     |       |
| 23   |     | Beijing | R       | R   | R      | R     | <0.43                     |       |
| 24   |     | Beijing | R       | R   | R      | R     | <0.43                     |       |
| 25   |     | Beijing | R       | R   | R      | R     | <0.43                     |       |
| 26   |     | -       | R       | R   | R      | R     | <0.43                     |       |
| 27   |     | Beijing | R       | R   | R      | R     | 7.02                      |       |
| 28   |     | -       | R       | R   | R      | R     | <0.43                     |       |
| 29   |     | -       | R       | R   | R      | R     | 7.02                      |       |
| 30   |     | Beijing | R       | R   | R      | R     | <0.43                     |       |
| 31   |     | Beijing | R       | R   | R      | R     | 28                        |       |

INH: isoniazid, Rif: rifampin; Strep: streptomycin, Oflox: ofloxacin

**Supplementary Table 5. *In vitro* pharmacokinetic and toxicity of Q203**

|                              |                                                                         |              |                                                                                                                                   |
|------------------------------|-------------------------------------------------------------------------|--------------|-----------------------------------------------------------------------------------------------------------------------------------|
| <b>Genotoxicity</b>          | Micronucleus formation                                                  | +S9 fraction | >60 $\mu\text{M}$<br>(Cyclophosphamide active at 5 $\mu\text{g ml}^{-1}$ )                                                        |
|                              |                                                                         | -S9 fraction | >60 $\mu\text{M}$<br>(mitomycin C active at 0.3 $\mu\text{g ml}^{-1}$ )                                                           |
|                              | Mini-Ames assay<br>(TA98 and TA100 bacteria)                            |              | >50 $\mu\text{M}$<br>(2-Aminoanthracene active at 0.4 $\text{mg ml}^{-1}$ ,<br>sodium azide active at 0.2 $\mu\text{g ml}^{-1}$ ) |
| <b>Metabolic stability</b>   | Microsomal stability<br>(Clint, $\mu\text{L min}^{-1} \text{mg}^{-1}$ ) | Human        | 10.3                                                                                                                              |
|                              |                                                                         | Rat          | 3.07                                                                                                                              |
|                              |                                                                         | Mouse        | 4.96                                                                                                                              |
|                              |                                                                         | Dog          | 2.35                                                                                                                              |
|                              | Cryopreserved hepatocytes<br>(% recovery after 4h)                      | Human        | 95.5 %                                                                                                                            |
|                              |                                                                         | Monkey       | 89.9 %                                                                                                                            |
|                              |                                                                         | Dog          | 90.9 %                                                                                                                            |
| Rat                          | 96.7 %                                                                  |              |                                                                                                                                   |
| <b>Drug-Drug interaction</b> | P- glycoprotein substrate/inhibitor<br>(IC <sub>50</sub> )              |              | >25 $\mu\text{M}$<br>(verapamil: 3.22 $\mu\text{M}$ )                                                                             |
|                              | hPXR activation                                                         |              | Negative at 0.1, 1 and 10 $\mu\text{M}$<br>(Rifampin: 12.8 fold induction at 10 $\mu\text{M}$ )                                   |
|                              | CYP inhibition (IC <sub>50</sub> )                                      | 1A2          | >10 $\mu\text{M}$<br>( <i>a</i> -naphthoflavone: 0.02 $\mu\text{M}$ )                                                             |
|                              |                                                                         | 2C9          | >10 $\mu\text{M}$<br>(sulfaphenazone: 0.50 $\mu\text{M}$ )                                                                        |
|                              |                                                                         | 2C19         | >10 $\mu\text{M}$<br>(+)-N-benzynirvanol: 0.46 $\mu\text{M}$ )                                                                    |
|                              |                                                                         | 2D6          | >10 $\mu\text{M}$<br>(quinidine: 0.05 $\mu\text{M}$ )                                                                             |
|                              |                                                                         | 3A4          | >10 $\mu\text{M}$<br>(ketoconazole: 0.02 $\mu\text{M}$ )                                                                          |
| <b>Cardiotoxicity</b>        | hERG patch clamp (IC <sub>50</sub> )                                    |              | >30 $\mu\text{M}$<br>(Amitriptyline: 1.90 $\mu\text{M}$ )                                                                         |

**Supplementary Table 6. Pharmacokinetic parameters of Q203 in mice after intravenous (IV) and oral (PO) administration**

|                       |                                       | IV    | PO     |
|-----------------------|---------------------------------------|-------|--------|
| Dose                  | mg kg <sup>-1</sup>                   | 2     | 10     |
| C <sub>max</sub>      | ng ml <sup>-1</sup>                   | 387   | 1,490  |
| T <sub>max</sub>      | h                                     | -     | 2.0    |
| V <sub>d</sub>        | L Kg <sup>-1</sup>                    | 5.27  | -      |
| Cl                    | mL min <sup>-1</sup> kg <sup>-1</sup> | 4.03  | -      |
| T <sub>1/2</sub>      | h                                     | 16.5  | 23.4   |
| AUC <sub>0-last</sub> | ng.h ml <sup>-1</sup>                 | 7,280 | 33,000 |
| AUC <sub>0-∞</sub> ¥  | ng.h ml <sup>-1</sup>                 | 8,280 | 44,100 |
| MRT <sub>0-last</sub> | h                                     | 15.0  | 17.8   |
| MRT <sub>0-∞</sub>    | h                                     | 21.8  | 33.9   |
| F                     | %                                     | -     | 90.7   |

**Supplementary Table 7. Mean Lung/Plasma ratio after oral dosing in mice**

| Sampling time (h) | Mean |   | S.D. |
|-------------------|------|---|------|
| 6.00              | 2.67 | ± | 0.39 |
| 12.00             | 2.11 | ± | 0.70 |
| 24.00             | 3.11 | ± | 0.55 |
| 48.00             | 2.61 | ± | 1.12 |
